# Supplementary material for: Modeling a COVID-19 Vaccination Campaign in the State of Madhya Pradesh, India
Source: Springer Nature journal article supplement (doi:10.1007/s40171-022-00326-9), 2022-12-14
Supplement: MOESM1 [file 23828220]

## Appendix 1.

**Table A1.** Roles and Responsibilities of Stakeholders

| S.No. | Stakeholder                                           | Description and predominant role/responsibilities                                                                                                                                        | Sub-CLD Group                                | Role in CLD    |
|-------|-------------------------------------------------------|------------------------------------------------------------------------------------------------------------------------------------------------------------------------------------------|----------------------------------------------|----------------|
| 1     | Central Government                                    | Government of India (GoI) and its administration responsible for centralized policy level decisions such as vaccine allocation to the states, development of CoWIN App                   | Policy                                       | Stakeholder    |
| 2     | State Government                                      | Government of Madhya Pradesh (GoMP) constituting state administration machinery. Responsible for policy decisions in various domains                                                     |                                              | Stakeholder    |
| 3     | Vaccines Allocation methodology                       | Vaccine allocation from centre to state and also vaccine distribution among various districts by GoMP                                                                                    |                                              | Process        |
| 4     | Session planning                                      | Daily multiple vaccination sessions at vaccination sites planned and organized                                                                                                           |                                              | Process        |
| 5     | Financial planning                                    | Planning done for allocation of funds for COVID-19 vaccination campaign such as infrastructure enhancement and cold chain storage equipment                                              |                                              | Process        |
| 6     | State leadership                                      | Individual officials responsible for decisions in respective domains at state level such as State Enhancement Programme Immunization Officer (SEPIO) and State Cold Chain Officer (SCCO) |                                              | Stakeholder    |
| 7     | District leadership                                   | Individual officials responsible for decisions in respective domains at state level such as District Immunization Officer (DIO) and Chief Medical and Health Officer (CMHO)              |                                              | Stakeholder    |
| 8     | Control rooms & Task forces                           | COVID-19 Command Centre (CCC) as a control room and task forces for immunization at state, district and block level                                                                      |                                              | Stakeholder    |
| 9     | Divisional Coordinators                               | Coordinator for immunization at divisional level (state of MP is divided into seven broad regional divisions)                                                                            |                                              | Stakeholder    |
| 10    | Development partners                                  | External and global agencies such as CHAI, JSI, KPMG, UNICEF, UNDP, WHO                                                                                                                  |                                              | Stakeholder    |
| 11    | COVID-19 situation                                    | COVID-19 pandemic outbreak and various parameter to watch its severity and impact on country, states, economy, and people                                                                |                                              | Ecosystem      |
| 12    | Political will                                        | Intent of state government, its administration, and leadership                                                                                                                           |                                              | Ecosystem      |
| 13    | Vaccines Distribution & Storage                       | Alternate vaccine delivery (AVD) system responsible for vaccine delivery                                                                                                                 | Infrastructure (Physical, HR, Technological) | Process        |
| 14    | AEFI Management                                       | Resources responsible to deal adverse effect following immunization (AEFI) related issues such as medical help, AEFI kits, grievances, monitoring etc.                                   |                                              | Process        |
| 15    | Cold chain storage & readiness                        | Cold chain supply-chain for vaccine storage and its stock management                                                                                                                     |                                              | Process        |
| 16    | Transport infrastructure, Distribution network, & AVD | Transportation and logistics infrastructure                                                                                                                                              |                                              | Infrastructure |
| 17    | Vaccines, Syringes and other session logistics        | Stock of vaccines, syringes, and other session logistics                                                                                                                                 |                                              | Infrastructure |
| 18    | AEFI kits                                             | AEFI dedicated kit containing various medical components required to treat AEFI cases                                                                                                    |                                              | Infrastructure |

|    |                                    |                                                                                                                                                                                                                                                                                                                                                                                                                                                                                              |             |                |
|----|------------------------------------|----------------------------------------------------------------------------------------------------------------------------------------------------------------------------------------------------------------------------------------------------------------------------------------------------------------------------------------------------------------------------------------------------------------------------------------------------------------------------------------------|-------------|----------------|
| 19 | Session site readiness             | All the components, human resource, technical and physical infrastructure required for functioning of vaccination sites                                                                                                                                                                                                                                                                                                                                                                      | Process     |                |
| 20 | Session network                    | Technological infrastructure like internet connection required for functioning of the technological Apps such as CoWIN                                                                                                                                                                                                                                                                                                                                                                       |             | Infrastructure |
| 21 | Vaccinator - ANMs                  | Auxiliary Nursing Midwife (ANM) who administer COVID-19 vaccine to the beneficiaries                                                                                                                                                                                                                                                                                                                                                                                                         |             | Stakeholder    |
| 22 | Vaccination team                   | Comprises of five members – vaccinator officer (doctors, staff nurse, pharmacist, ANMs); vaccination officer 1 (one person from police, home guard, civil defence etc. to check the registration of beneficiary at entry and ensure regulated entry at vaccination site); vaccination officer 2 (verifier to authenticate or verify the documents); vaccination officer 3 & 4 (two support staff for crowd management and will provide IEC message, support vaccinator and vaccination team) |             | Stakeholder    |
| 23 | Cold chain workers                 | State cold chain officer (SCCO), vaccine and cold chain handlers (VCCH/CCH), cold chain technicians (CCT), store in-charge etc.                                                                                                                                                                                                                                                                                                                                                              |             | Stakeholder    |
| 24 | ASHA & Anganwadi                   | Accredited Social Health Activist (ASHA) and Anganwadi workers (AWWs) for effective social and community mobilization are included in frontline health workers (FHW)                                                                                                                                                                                                                                                                                                                         |             | Stakeholder    |
| 25 | Software - CoWIN, G-sheets         | CoWIN App is a mobile and web portal to capture details and manage parameters such as vaccination session creation, vaccination booking, demographic details of beneficiaries, doses administered, vaccination certificate download and many more functionalities. Google Sheets (G-sheets) used as a parallel for data entry during initial phase of vaccination campaign                                                                                                                   |             | Infrastructure |
| 26 | Private health sector              | Include private hospitals, nursing homes, clinics, diagnostic laboratories etc.                                                                                                                                                                                                                                                                                                                                                                                                              |             | Stakeholder    |
| 27 | NGOs                               | Non-governmental organizations (NGOs)                                                                                                                                                                                                                                                                                                                                                                                                                                                        |             | Stakeholder    |
| 28 | Industrial bodies                  | Various industrial bodies to support infrastructure for the vaccination campaign or for community mobilization                                                                                                                                                                                                                                                                                                                                                                               |             | Stakeholder    |
| 29 | Government Inter-departments       | Various government departments and ministries such as women and child development, health department, AYUSH, urban and rural development, state police department, defence, minority affairs, tribal affairs, information and technology, railways, education, transportation, sports and youth, revenue, etc.                                                                                                                                                                               |             | Stakeholder    |
| 30 | Mobilisation plan                  | Plan for social mobilization and community engagement                                                                                                                                                                                                                                                                                                                                                                                                                                        |             | Information    |
| 31 | IEC and communication strategy     | Information, education and communication (IEC) strategy to address four key areas such as information on the new COVID-19 vaccine, vaccine hesitancy, vaccine eagerness, COVID-19 appropriate behaviours (CABs)                                                                                                                                                                                                                                                                              |             | Process        |
| 32 | Campaign strategy and adaptability | Strategy for sharing relevant information on the vaccination campaign (pre-vaccine launch and during campaign)                                                                                                                                                                                                                                                                                                                                                                               |             | Process        |
| 33 | RKSK Sathiya                       | Rashtriya Kishor Swasthya Karyakram (RKSK) Sathiya are adolescent (age group of 10-19 years) volunteers under the RKSK programme launched by the MoHFW in 2014. It's aim is to meet million teenagers with emphasis on marginalized and underserved communities to make informed and responsible decisions related to their health and well-being                                                                                                                                            | Stakeholder |                |
| 34 | Community Mobilisers               | Reputed and trusted individuals, heads of villages, religious heads, retired government officials such as teachers etc.                                                                                                                                                                                                                                                                                                                                                                      | Stakeholder |                |

|    |                              |                                                                                                                                                                                                                         |                           |                |
|----|------------------------------|-------------------------------------------------------------------------------------------------------------------------------------------------------------------------------------------------------------------------|---------------------------|----------------|
| 35 | Panchayats, Medical Colleges | Members of panchayat such as heads, members, ' <i>sachiv</i> ' (secretary) and medical colleges                                                                                                                         |                           | Stakeholder    |
| 36 | Youth influencers            | Young influencers such as social media influencers, celebrities, sports person                                                                                                                                          |                           | Stakeholder    |
| 37 | Education institutes         | Educational institutes such as schools and colleges                                                                                                                                                                     |                           | Stakeholder    |
| 38 | Tribal & Forest department   | Departments under Ministry of Tribal Affairs and State Forest Department                                                                                                                                                |                           | Stakeholder    |
| 39 | Vaccine hesitancy            | Refusal or reluctance shown by an individual towards vaccines due to various reasons despite the availability of vaccine services                                                                                       |                           | Information    |
| 40 | Community rumours            | Misinformation or disinformation circulating related to COVID-19 vaccines among communities and individuals                                                                                                             |                           | Information    |
| 41 | Communication & Media        | Department of information and publicity and state media agencies at state and district levels, issue of press releases to provide relevant information, timely and clear information to avoid rumours and misconception |                           | Stakeholder    |
| 42 | Review & Monitoring          | Supervision by different stakeholders to review and monitor different aspects related to reporting, data, feedback, etc.                                                                                                | Monitoring and Management | Information    |
| 43 | Security & Police            | State police department and security forces                                                                                                                                                                             |                           | Stakeholder    |
| 44 | Data analytics               | Technical and human resource for analysing data related to COVID-19 vaccination campaign                                                                                                                                |                           | Infrastructure |
| 45 | Training Department          | Different agencies, development partners, state department imparting training to various stakeholders at state and district levels                                                                                      |                           | Stakeholder    |
| 46 | Tele-calling unit            | State tele-calling helpline staff at COVID-19 Command Centre (CCC) and at national level                                                                                                                                |                           | Stakeholder    |
| 47 | COVID-19 Volunteers          | Citizens of MP who volunteered to work for the COVID-19 vaccination campaign                                                                                                                                            |                           | Stakeholder    |
